# Supplementary material
Source: publisher figshare collection journal article supplement (https://acs.figshare.com/ndownloader/files/4626376)

## SUPPORTING INFORMATION AVAILABLE

This information is available free of charge via the Internet at <http://pubs.acs.org>.

**Figure S1** shows IR spectra recorded at 100 K of MIL-101a, 101b and 101c outgassed at 473 K after introduction of an equilibrium pressure (200 Pa) of CO (spectra a, b and c respectively).

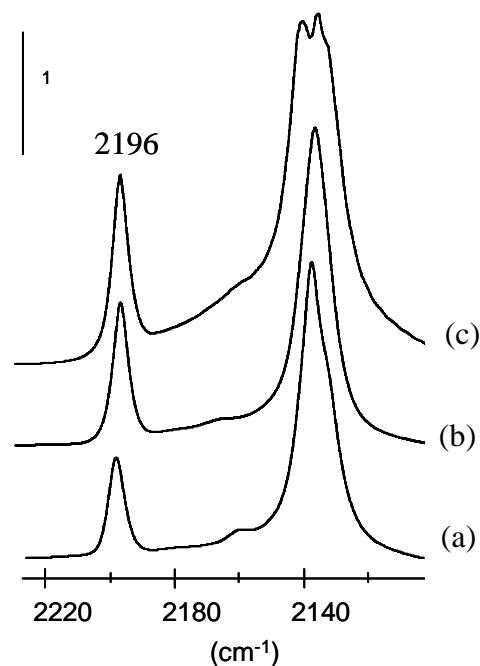

These spectra show only a single sharp  $\nu(\text{CO})$  band centered at  $2196\text{ cm}^{-1}$  regardless of pre-treatment. The position and the intensity of this  $\nu(\text{CO})$  band are close to those assigned to the less acidic  $\text{Cr}^{3+}$  sites present in the MIL-100. Using an absorption coefficient equal to  $2.1\text{ cm}^{-1}\text{ }\mu\text{mol}^{-1}$  [19] it is possible to deduce that the concentration of the Lewis acid sites in the MIL-101a b and c is equal to 500, 700 and  $1000\text{ }\mu\text{mol g}^{-1}$  respectively. This concentration is three fold lower than that observed in the MIL-100 showing that accessible Lewis acid sites are stronger and more abundant in MIL-100 than in MIL-101 materials. Since the configuration of the trimers of chromium octahedra is similar in both structures, the lower acidity of the MIL-101 materials could be explained by the presence of extra framework impurities persisting inside the pores even after activation. This is confirmed by the IR spectra here which indicate a C/Cr ratio higher than expected.

**Figure S2** shows the IR spectra of MIL-101b (upper curves) and MIL-100 (lower curves) obtained after equilibrium with 2330 Pa CO<sub>2</sub> pressure (a and e) followed by various regeneration treatments :

5 minutes under 1.5 Pa vacuum at 303 K (b and f),

5 minutes under 0.015 Pa vacuum at 303 K (c and g),

Thermal treatment to 473 K under 0.015 Pa (d and h).

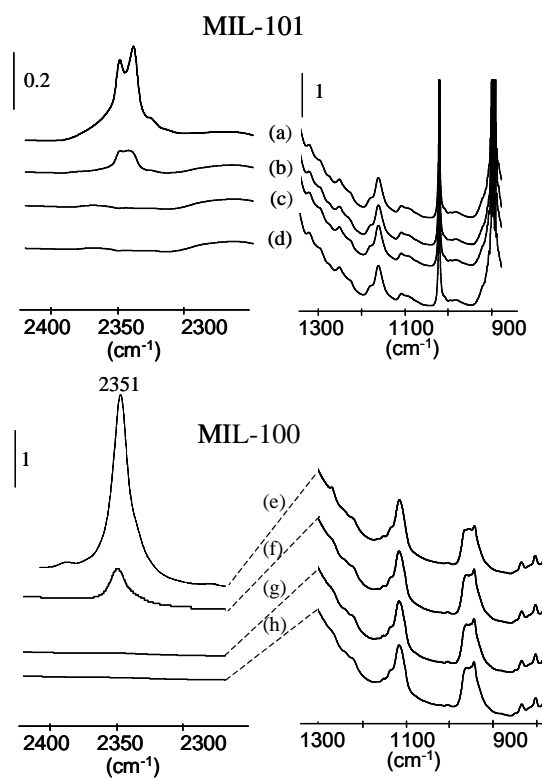

Supplement: Supplementary file 1 [file 4626376]
